# Supplementary material for: Histone demethylation by a family of JmjC domain-containing proteins
Source: Springer Nature journal article supplement (doi:10.1038/nature04433), 2005-12-18

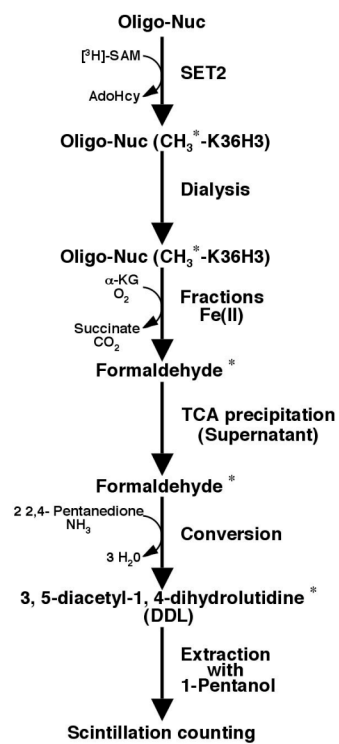

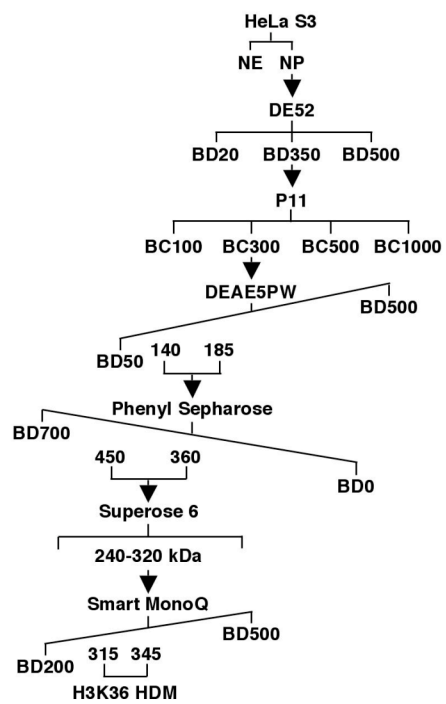

a

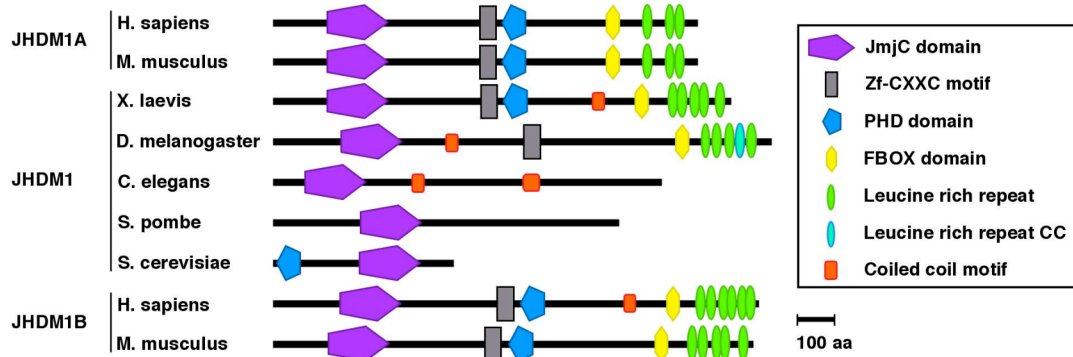

b

|        |                 |     |                                                                             |     |
|--------|-----------------|-----|-----------------------------------------------------------------------------|-----|
|        | FIH1            | 144 | LYLQQTNDTVGKIV---MDFLGFNNWINKQO-----GKRGWGQL-----TSNLLIGMEGNVTPAHYD--       | 201 |
| JHDM1A | H. sapiens      | 148 | FSHTRLENMVFQNPSTVDFIDWVDNMPRHLKES-----QTESINAILEMOYPKVKYKCYCLMSVRCGYTDFHVDG | 216 |
|        | M. musculus     | 148 | FSHTRLENMVFQNPSTVDFIDWVDNMPRHLKES-----QTESINAILEMOYPKVKYKCYCLMSVRCGYTDFHVDG | 216 |
| JHDM1  | X. laevis       | 147 | FSHTRLERVVKRPTVVDVAVDWDNMPRHLKEQ-----QKESINVIAMKYPKVKYKCYCLMSVRCGYTDFHVDG   | 215 |
|        | D. melanogaster | 180 | FSHTRLDRFVQSPETVRQIDWVDVWPKQLKDA-----QREGTNLLGGMYPKVKYKCYCLMSVRCGYTDFHVDG   | 248 |
| JHDM1B | C. elegans      | 93  | FSQPLLEDLVKSPQLVRQIDWVDNMPDALARQRWISFNDRDKKFINPHHTFPKVVNFCCLMSVANCYTDFHIDFS | 166 |
|        | S. pombe        | 243 | VSTIKLQAYYVRKPNIVRDLDVNTVWMP-----PGSFALGE--YFIVDTYCLMSAENSYTEFHIDFG         | 301 |
|        | S. cerevisiae   | 245 | IEGLELE---RPTAVRQNDLVKIKWSFNHGLE-----KVNGEKAENEKPKVKYKCYCLMSVRCGYTDFHVDG    | 309 |
| JHDM1B | H. sapiens      | 178 | FSHTRLEHLVVRPTVVDLVDWVDNMPQHLKES-----QTEATNAIAEMKYPKVKYKCYCLMSVRCGYTDFHVDG  | 246 |
|        | M. musculus     | 147 | FSHTRLEHLVVRPTVVDLVDWVDNMPQHLKES-----QTEATNAIAEMKYPKVKYKCYCLMSVRCGYTDFHVDG  | 215 |
| JHDM1A | FIH1            | 202 | EQQNFFAQIKGKRCILFPDQFECIYFYPVHHPCDRQSO-VDFDNPDIYERFPNFQNVVGYETVVGFGDVLVYIFM | 275 |
|        | H. sapiens      | 217 | GTSVWVHIHQGKVFVLIPTTAHN-LELYENWLLSGKQGD-IFLGD---RVSDCORI---ELKQGYTFVIFPS    | 280 |
|        | M. musculus     | 217 | GTSVWVHIHQGKVFVLIPTTAHN-LELYENWLLSGKQGD-IFLGD---RVSDCORI---ELKQGYTFVIFPS    | 280 |
|        | X. laevis       | 216 | GTSVWVHIFRGGKVFVLIPTTGHN-LQLYEENWLLSGKQGD-IFLGD---RSECCORI---ELKQGYTFVIFPS  | 279 |
|        | D. melanogaster | 249 | GTSVWVHILRGGKVFVLIPTTDRN-LQLYEENWLLSGKQGD-IFFGD---TVEKCAV---YLTAGNAFFIPT    | 312 |
| JHDM1  | C. elegans      | 167 | GTSVWVHILRGGKVFVLIPTTETN-FFIYQEFIKTVNDN---AFFCK---SVEKCHVA---ILEPGDAMLIFPS  | 229 |
|        | S. pombe        | 302 | GTSVWVHILRGGKVFVLIPTTQSN-WEANTAWLTSNDSKPKLFPN---MVDVCYCV---EVHSQDAILVPS     | 366 |
|        | S. cerevisiae   | 310 | GTSVWVHIFRGGKVFVLIPTTQSN-IDKVIENSLKEDQNS-VFLGD---ILBGIAM---BLDAGDLMFIPA     | 373 |
| JHDM1B | H. sapiens      | 247 | GTSVWVHIFRGGKVFVLIPTTLHN-LALYEEWLLSGKQSD-IFLGD---RVERCORI---ELKQGYTFVIFPS   | 310 |
|        | M. musculus     | 216 | GTSVWVHIFRGGKVFVLIPTTLHN-LALYEEWLLSGKQSD-IFLGD---RVERCORI---ELKQGYTFVIFPS   | 279 |
| JHDM1A | FIH1            | 276 | YWAHHI---ESILNGGITITVNFYKGAFTPKRIEYPLK-                                     | 311 |
|        | H. sapiens      | 281 | GWIHAVYTFDLSLVFGG---NFLHSENPMPOLKIYSEID                                     | 316 |
|        | M. musculus     | 281 | GWIHAVYTFDLSLVFGG---NFLHSENPMPOLKIYSEID                                     | 316 |
|        | X. laevis       | 280 | GWIHAVYTFDLSLVFGG---NFLHSENPMPOLRVFEID                                      | 315 |
| JHDM1  | D. melanogaster | 313 | GWIHAVYTFDLSLVFGG---NFLHSENPMPOLRVFEID                                      | 348 |
|        | C. elegans      | 230 | GWIHAVYTFDLSLVFGG---NFLHSENPMPOLRVFEID                                      | 265 |
| JHDM1B | S. pombe        | 367 | GWIHAVYTFDLSLVFGG---NFLHSENPMPOLRVFEID                                      | 402 |
|        | S. cerevisiae   | 374 | GWIHAVYTFDLSLVFGG---NFLHSENPMPOLRVFEID                                      | 409 |
| JHDM1B | H. sapiens      | 311 | GWIHAVYTFDLSLVFGG---NFLHSENPMPOLRVFEID                                      | 346 |
|        | M. musculus     | 280 | GWIHAVYTFDLSLVFGG---NFLHSENPMPOLRVFEID                                      | 315 |

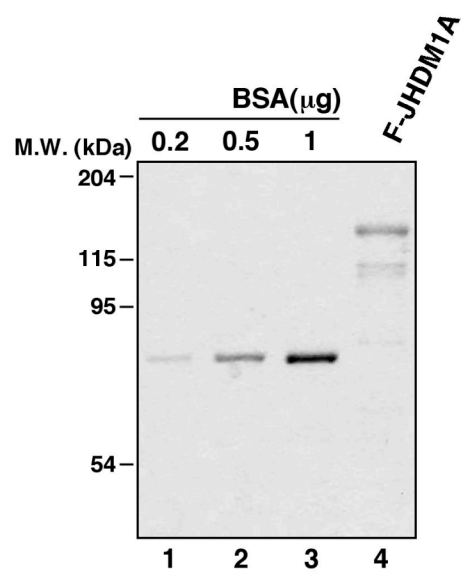

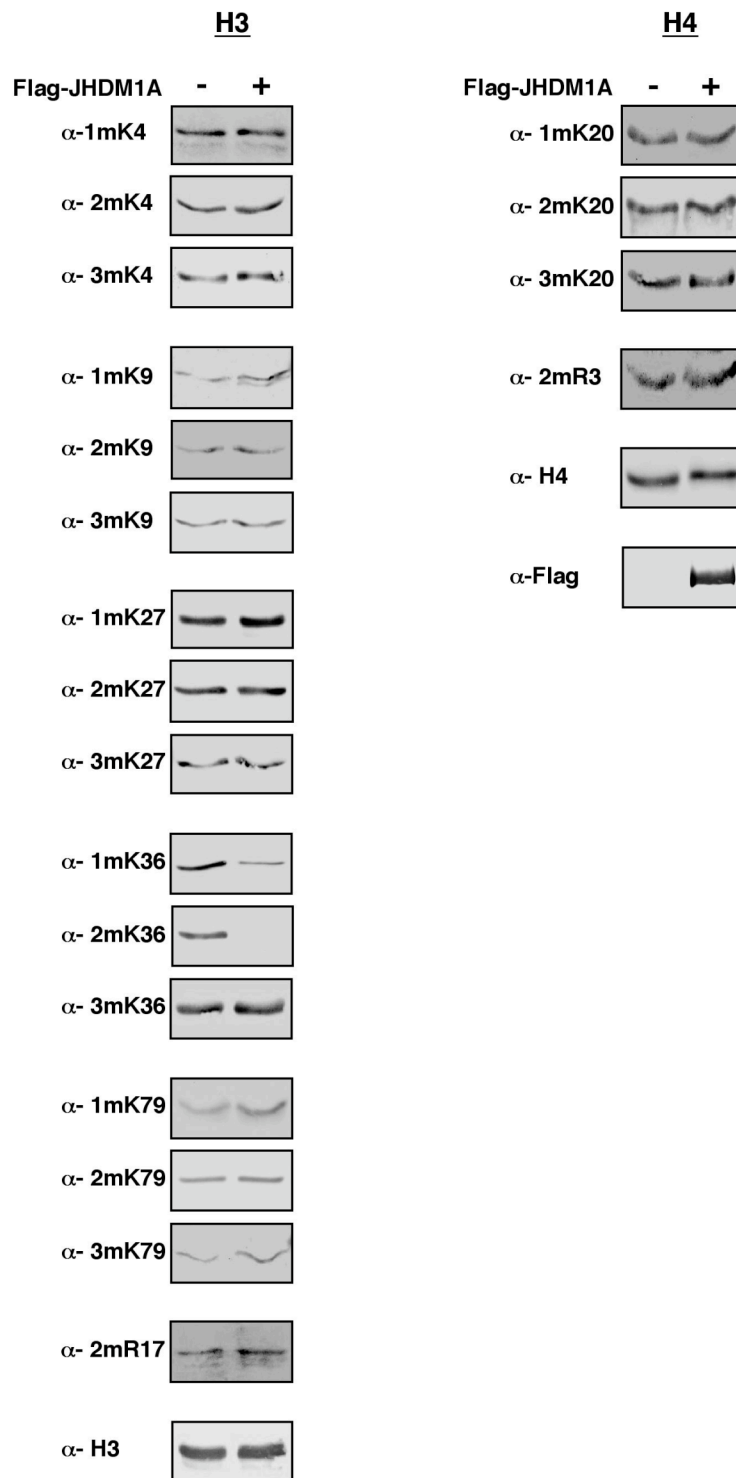

a

|                                                      |            | peptide (%) |            |           |
|------------------------------------------------------|------------|-------------|------------|-----------|
| F-JHDM1                                              | Time (min) | Dimethyl    | Monomethyl | no methyl |
| 1.25 ( $\mu\text{g}$ )<br>enzyme:substrate<br>(1:80) | 0          | 100         | 0          | 0         |
|                                                      | 5          | 100         | 0          | 0         |
|                                                      | 15         | 91.6        | 8.4        | 0         |
|                                                      | 60         | 84.7        | 15.3       | 0         |
|                                                      | 180        | 82.5        | 17.5       | 0         |
| 2.5 ( $\mu\text{g}$ )<br>enzyme:substrate<br>(1:40)  | 0          | 100         | 0          | 0         |
|                                                      | 5          | 94          | 6          | 0         |
|                                                      | 15         | 89.2        | 10.8       | 0         |
|                                                      | 60         | 78.1        | 17.9       | 4         |
|                                                      | 180        | 62.3        | 29.7       | 8         |
| 5 ( $\mu\text{g}$ )<br>enzyme:substrate<br>(1:20)    | 0          | 100         | 0          | 0         |
|                                                      | 5          | 84.8        | 15.2       | 0         |
|                                                      | 15         | 84.1        | 15.9       | 0         |
|                                                      | 60         | 62.8        | 29.7       | 7.5       |
|                                                      | 180        | 46.1        | 36.7       | 17.2      |

b

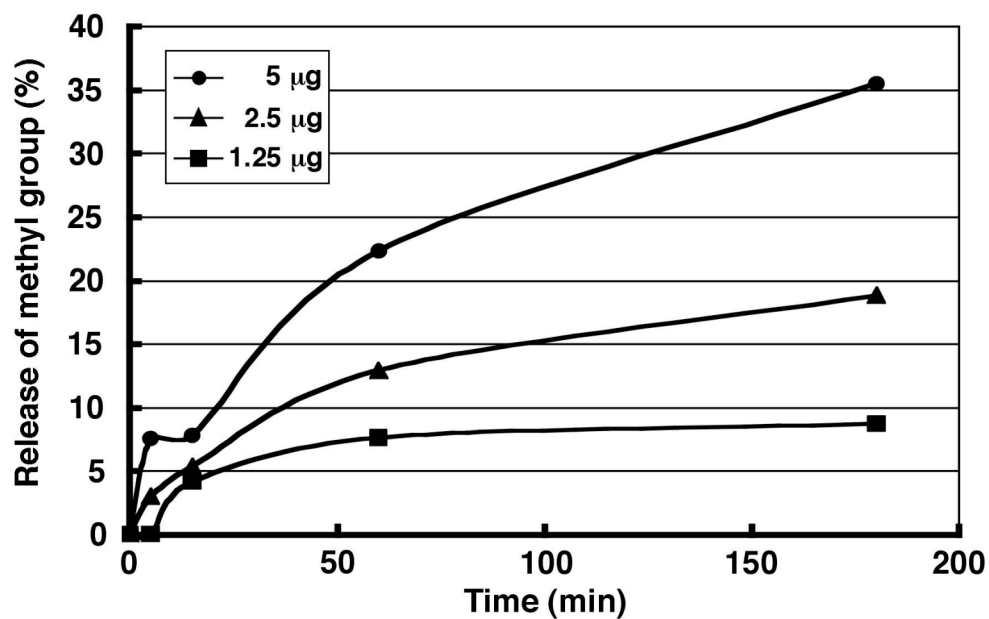

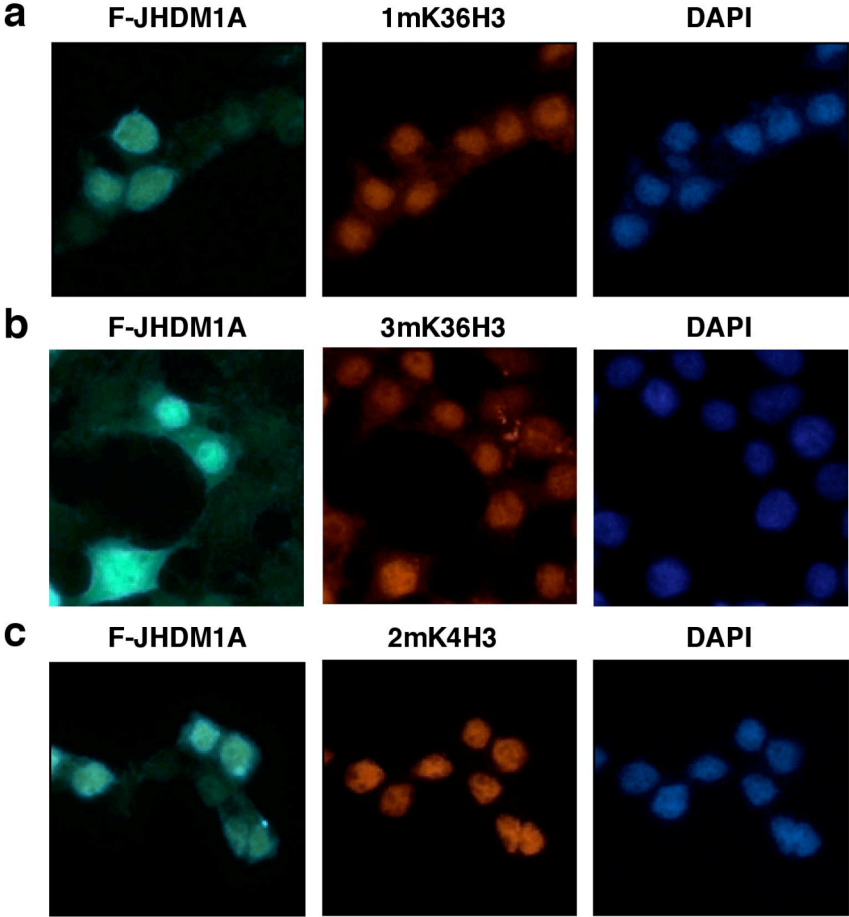

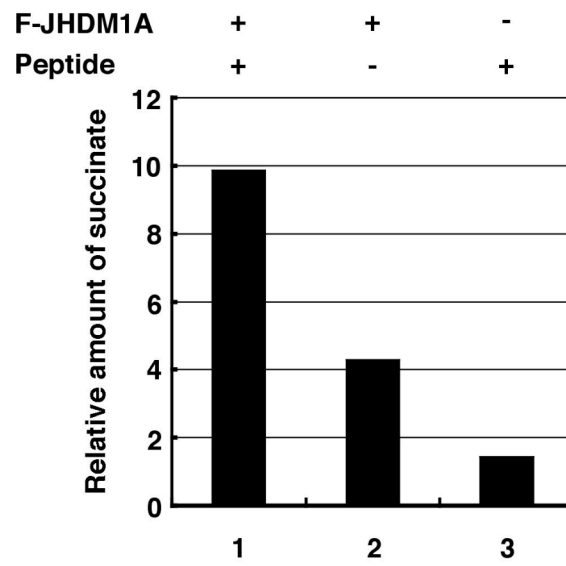



**a**

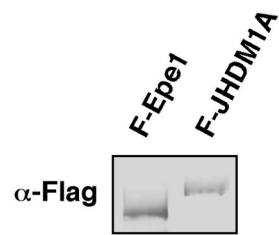

**b**

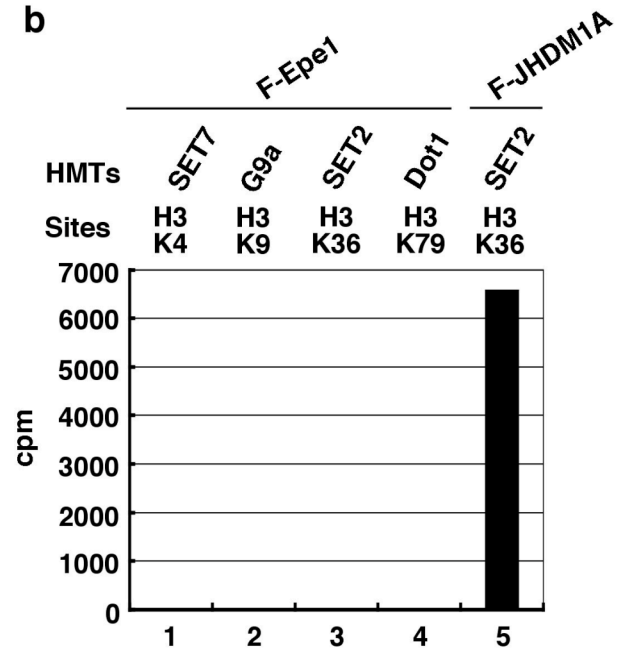

Supplement: 41586_2006_BFnature04433_MOESM1_ESM.pdf [file 41586_2006_BFnature04433_MOESM1_ESM.pdf]
